# Supplementary material for: Synergistic activity of binary metal sulphide WS2–RuS2nanospheres for the electrochemical detection of the antipsychotic drug promazine
Source: Royal Society of Chemistry journal article supplement (doi:10.1039/d0nj00096e), 2020-01-01
Supplement: d0nj00096e1.pdf [file d0nj00096e1.pdf]

**Supporting information**

**Synergistic activity of binary metal sulphide WS<sub>2</sub>-RuS<sub>2</sub> nanospheres for the electrochemical detection of antipsychotic drug promazine**

Rajalakshmi Sakthivel<sup>a</sup>, Muthaiah Annalakshmi<sup>a</sup>, Shen-Ming Chen<sup>\*,a</sup>, Subbiramaniyan Kubendhiran<sup>b</sup>

<sup>a</sup>Department of Chemical Engineering and Biotechnology, National Taipei University of Technology, Taipei 106, Taiwan, ROC.

<sup>b</sup>Department of Chemical Engineering, National Taiwan University, Taipei, Taiwan.

**Corresponding Author:**

\*S.M. Chen, Fax: +886227025238, Tel: +886227017147, E mail: smchen78@ms15.hinet.net

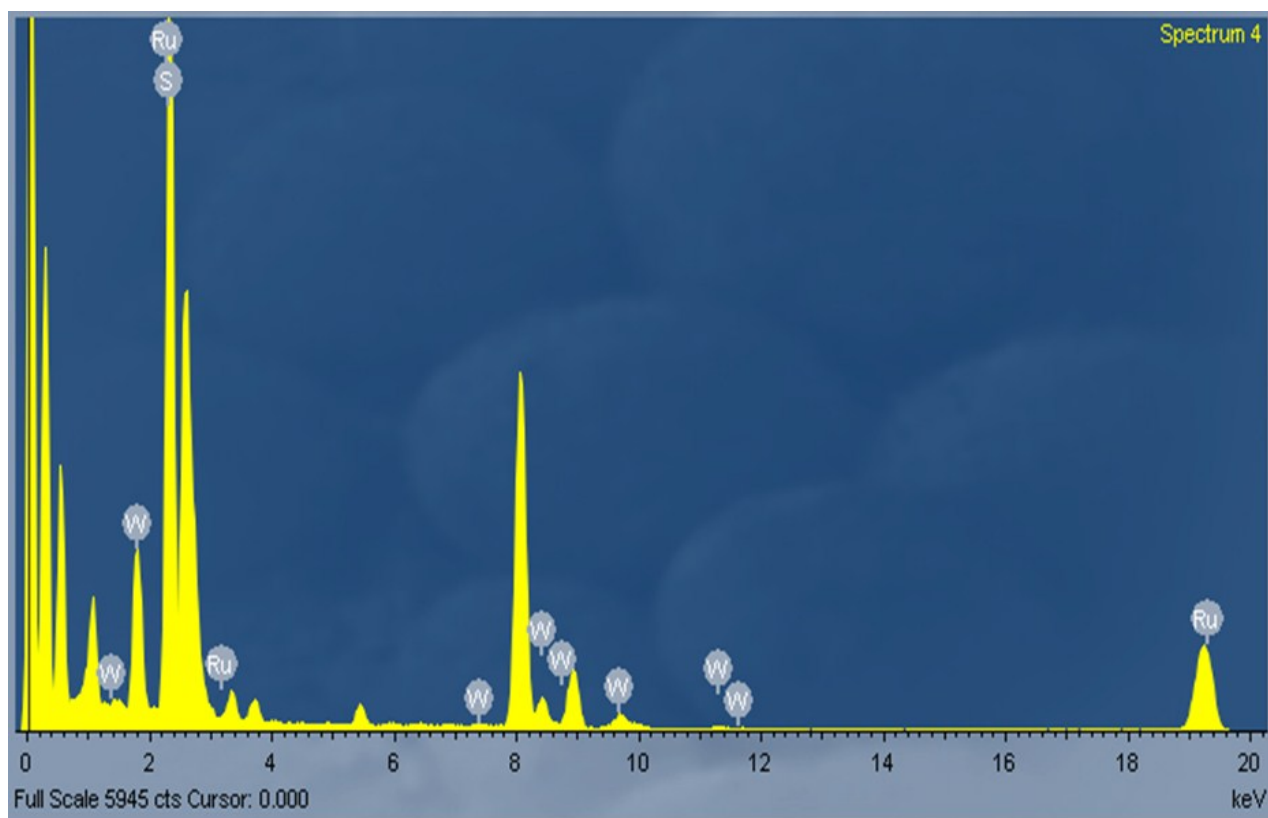

**Fig. S1** EDX spectra depict the higher magnification view of WS<sub>2</sub>-RuS<sub>2</sub> nanomaterial.

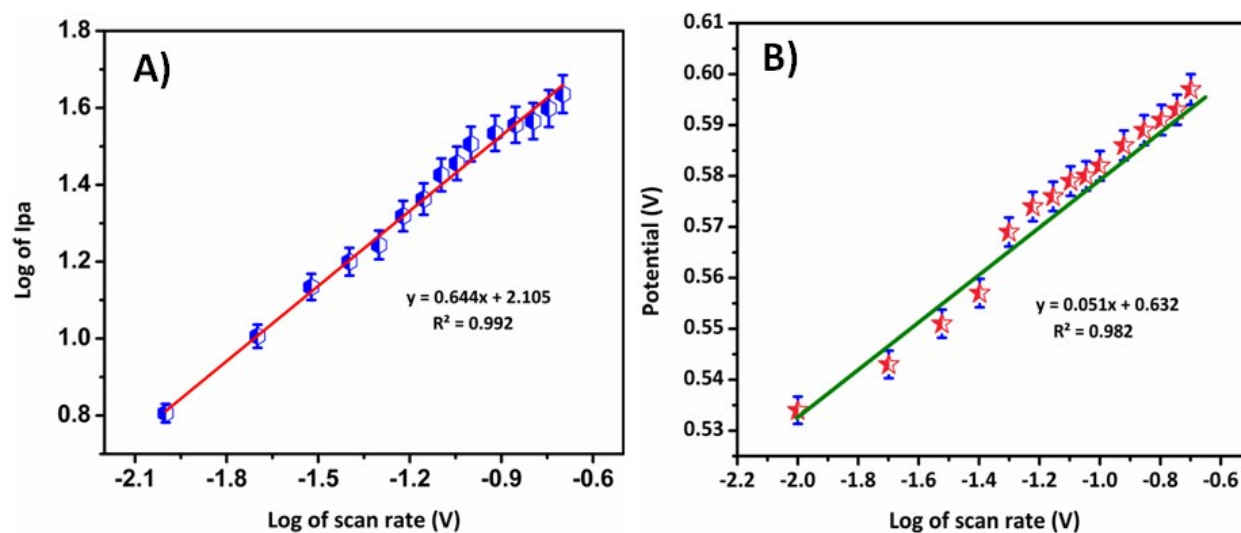

**Fig.S2** (A) The calibration plot between the log of scan rate versus log of anodic peak current (I<sub>pa</sub>). (B) The plot for the log of scan rate against anodic peak potential (E<sub>pa</sub>).

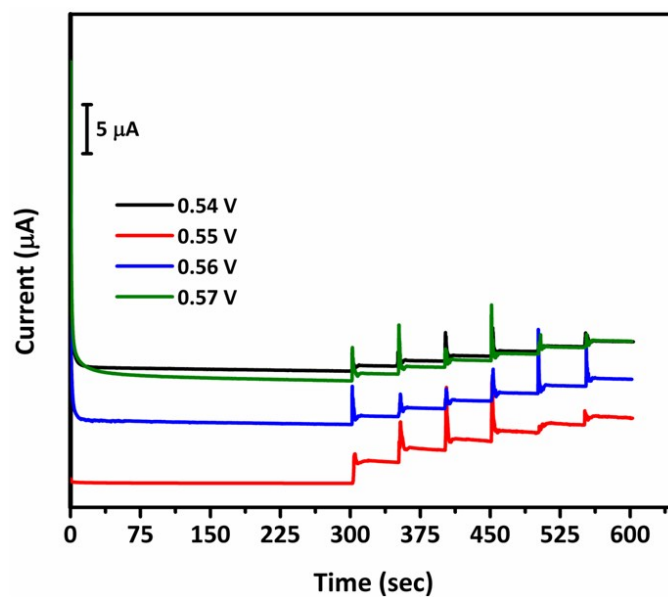

**Fig. S3** Amperometric (i-t) response of the four variant potentials including 0.54, 0.55, 0.56 and 0.57 V at WS<sub>2</sub>-RuS<sub>2</sub> modified RDE.

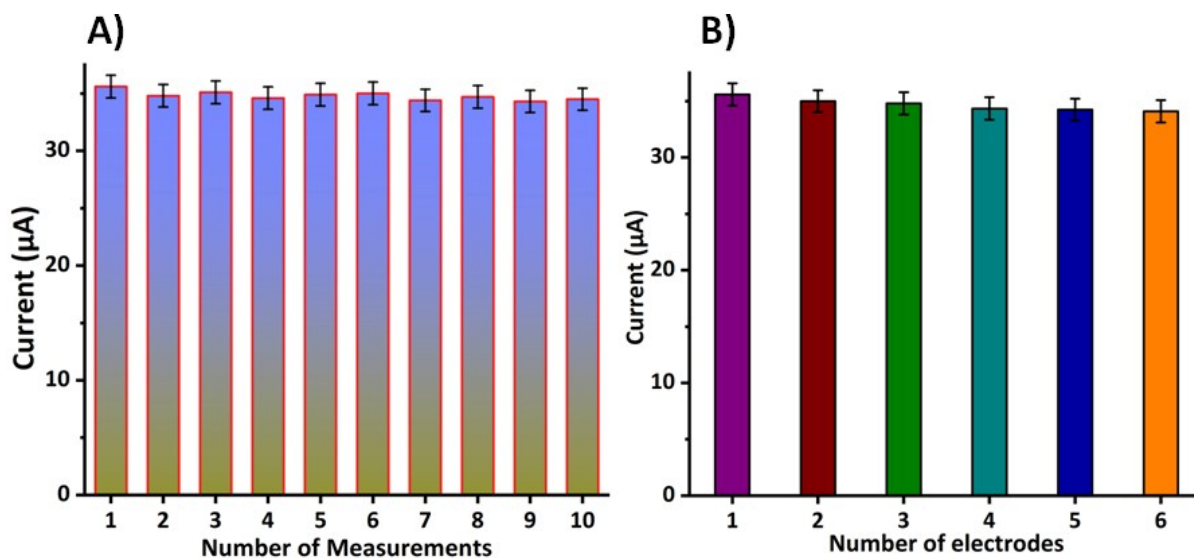

**Fig. S4** The bar diagrams shows the repeatability (A) and reproducibility (B) analysis of the modified electrodes.
